# Supplementary material
Source: PubMed Central journal article supplement (PMC3752101)

# Embedding A $\beta$ 42 in Heterogeneous Membranes Depends on Cholesterol Asymmetries

Nicoletta Liguori,<sup>†</sup> Paul S. Nerenberg,<sup>‡</sup> and Teresa Head-Gordon<sup>§¶||\*</sup>

<sup>†</sup>Department of Physics, University of Roma Tre, Roma, Italy; <sup>‡</sup>W. M. Keck Science Department, Claremont McKenna, Pitzer, and Scripps Colleges, Claremont, California; and <sup>§</sup>Department of Chemistry, <sup>¶</sup>Department of Bioengineering, and <sup>||</sup>Department of Chemical and Biomolecular Engineering, University of California, Berkeley, California

## SUPPLEMENTARY MATERIAL

**Figure S1.** Results for the ~30% helical A $\beta$ 42 peptide for the most asymmetric 30%/70% *exo/cyto* cholesterol distribution with 40% total cholesterol at 323K. (a) Free energy profile as a function of the distance between the centers of mass of the A $\beta$ 42 peptide and lipid bilayer ( $D_{COM}$ ) which shows that the entire peptide is *irreversibly* exposed to the extracellular region and to the membrane surface. (b) Solvent accessible surface area (SASA) at the free energy minimum which shows that the entire peptide is fully exposed to the membrane surface and solvent on the exofacial side.

(a)

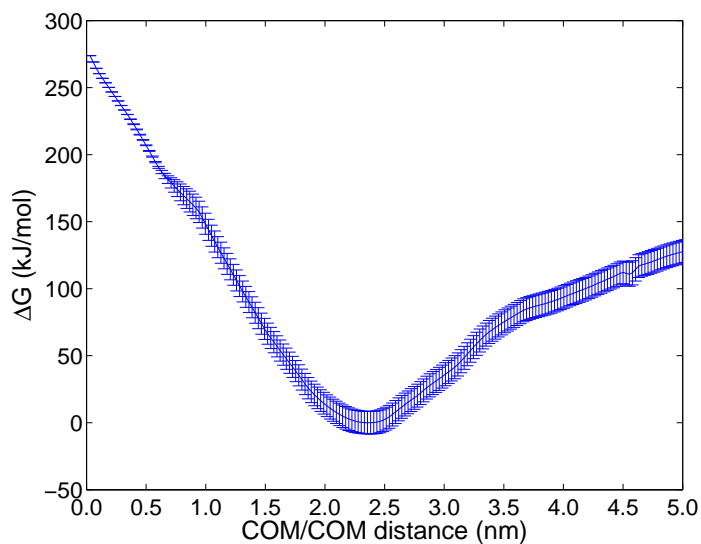

(b)

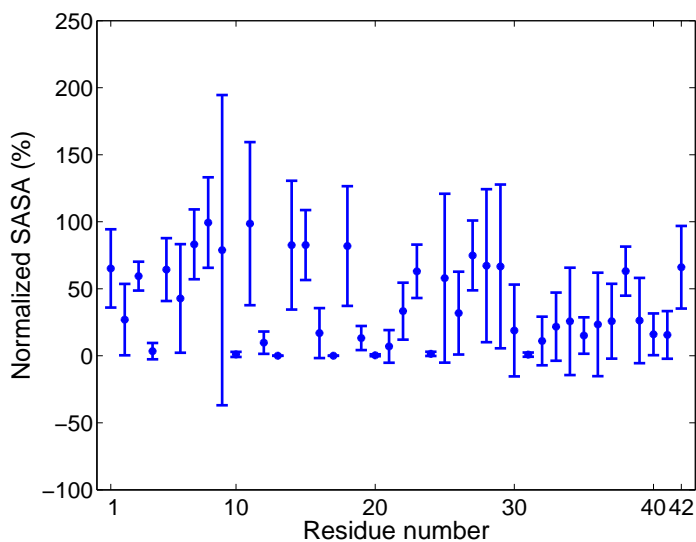

**Figure S2.** The radial distribution function of the A $\beta$  peptide with different lipid and sterol components for the symmetric 50%/50% exo/cyto cholesterol distribution with total cholesterol of 40%. This plot also includes the PE ligand whose trends are very similar to the PC RDF.

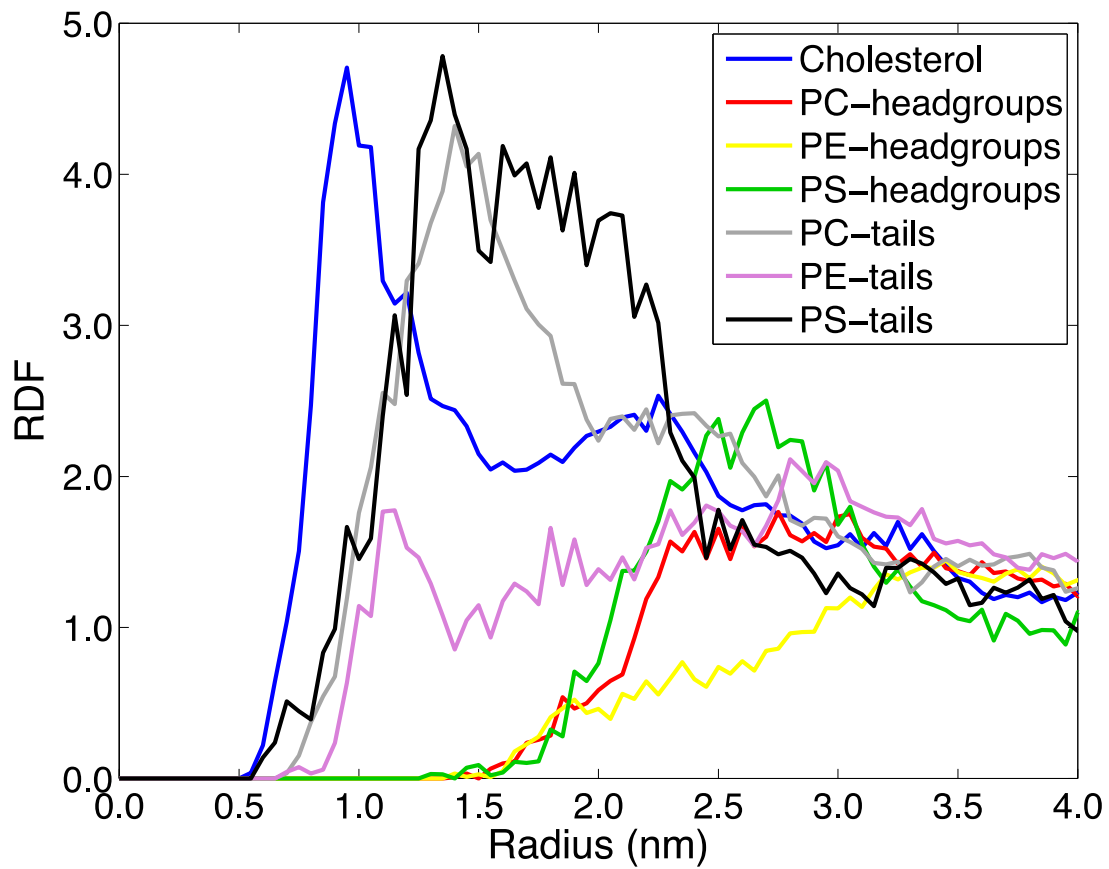

Supplement: mmc1.pdf [file mmc1.pdf]
